# Supplementary material
Source: publisher site journal article supplement (https://www.dovepress.com/article/310453)
Supplement: Supplementary file 1 [file get_supplementary_file.php]

**Supplementary file 1**: Socio-demographic characteristics of doctors and medical students, significant associations identified, characteristics surrounding willingness to work/volunteer (Table S1-S6).

| **Characteristics** | **Doctors**  **n (%)** |
| --- | --- |
| **Gender** | |
| Male | 67 (35.8) |
| Female | 120 (64.2) |
|  | |
| **Age mean (SD), yr** | 27.5 (4.2) |
|  | |
| **Marital Status** | |
| Unmarried | 124 (66.3) |
| Married | 62 (33.2) |
| Divorced/Separated | 1 (0.5) |
|  | |
| **Married with children** | |
| Yes | 33 (17.7) |
| No | 30 (16.0) |
| Not applicable | 124 (66.3) |
|  | |
| **Dependents** | |
| Yes | 49 (26.2) |
| No | 138 (73.8) |
|  | |
| **Training level** | |
| Consultant | 17 (9.1) |
| Resident | 58 (31.0) |
| Medical officer | 57 (30.5) |
| House officer | 46 (24.6) |
| Graduate only | 9 (4.8) |
|  | |
| **Living arrangements** | |
| Living alone | 11 (5.9) |
| Living with parents and/or siblings only | 129 (69.0) |
| Living with parents/in-laws, spouse and children only | 30 (16.0) |
| Living with spouse and/or children only | 17 (9.1) |
|  | |
| **Health status** | |
| Poor | 3 (1.6) |
| Average | 28 (15.0) |
| Good | 108 (57.8) |
| Excellent | 48 (25.7) |
|  | |
| **Information sources** | |
| Official sources | 99 (52.9) |
| Unofficial sources | 56 (29.9) |
| Both | 32 (17.1) |

**Table S1:** Socio-demographic characteristics of doctors

| **Characteristics** | **Medical students**  **n (%)** |
| --- | --- |
| **Gender** | |
| Male | 58 (29.0) |
| Female | 142 (71.0) |
|  | |
| **Age mean (SD), yr** | 21.5 (1.4) |
|  | |
| **Marital Status** | |
| Unmarried | 194 (97.0) |
| Married | 6 (3.0) |
|  | |
| **Married with children** | |
| Yes | 1 (0.5) |
| No | 5 (2.5) |
| Not applicable | 194 (97.0) |
|  | |
| **Academic year of study** | |
| 1st year MBBS | 10 (5.0) |
| 2nd year MBBS | 28 (14.0) |
| 3rd year MBBS | 74 (37.0) |
| 4th year MBBS | 38 (19.0) |
| 5th year MBBS | 50 (25.0) |
|  | |
| **Living arrangements** | |
| Living alone on campus/residence | 6 (3.0) |
| Living with family in residence | 187 (93.5) |
| Living with roommate(s) on campus/residence | 7 (3.5) |
|  | |
| **Health status** | |
| Poor | 4 (2.0) |
| Average | 39 (19.5) |
| Good | 120 (60.0) |
| Excellent | 37 (18.5) |
|  | |
| **Information sources** | |
| Official sources | 75 (37.5) |
| Unofficial sources | 89 (44.5) |
| Both | 36 (18.0) |

**Table S2:** Socio-demographic characteristics of medical students

|  | **Academic year of study** | | | | | **P - value** |
| --- | --- | --- | --- | --- | --- | --- |
|  | **1st year MBBS** | **2nd year MBBS** | **3rd year MBBS** | **4th year MBBS** | **5th year MBBS** |  |
| **n (%)** | **n (%)** | **n (%)** | **n (%)** | **n (%)** |
| **Which information sources do you turn to for COVID-19 information** | | | | | | 0.010* |
| Official sources | 2 (20.0) | 4 (14.3) | 27 (36.5) | 19 (50.0) | 23 (46.0) |
| Unofficial sources | 4 (40.0) | 17 (60.7) | 35 (47.3) | 17 (44.7) | 16 (32.0) |
| Both | 4 (40.0) | 7 (25.0) | 12 (16.2) | 2 (5.3) | 11 (22.0) |
|  | | | | | | |
| **Are you willing to volunteer during the pandemic** | | | | | | 0.031** |
| Yes | 5 (50.0) | 7 (25.0) | 43 (58.1) | 22 (57.9) | 28 (56.0) |
| No | - | 8 (28.6) | 11 (14.9) | 5 (13.2) | 3 (6.0) |
| I don’t know | 5 (50.0) | 13 (46.4) | 20 (27.0) | 11 (28.9) | 19 (38.0) |
|  | | | | | | |
| **Which hospital role would you be willing to volunteer for** | | | | | | 0.003* |
| COVID unit | 1 (10.0) | - | 6 (8.1) | 4 (10.5) | 6 (12.0) |
| Non-COVID unit | 7 (70.0) | 16 (57.1) | 28 (37.8) | 19 (50.0) | 27 (54.0) |
| Both | - | 3 (10.7) | 24 (32.4) | 12 (31.6) | 14 (28.0) |
| Not willing | 2 (20.0) | 9 (32.1) | 16 (21.6) | 3 (7.9) | 3 (6.0) |
|  | | | | | | |
| **I would be willing to volunteer during the pandemic if I am healthy and able to** | | | | | | 0.023* |
| Strongly disagree | - | 4 (14.3) | 10 (13.5) | - | 2 (4.0) |
| Somewhat disagree | - | 2 (7.1) | 5 (6.8) | 1 (2.6) | 1 (2.0) |
| Neutral | - | 5 (17.9) | 17 (23.0) | 5 (13.2) | 9 (18.0) |
| Somewhat agree | 6 (60.0) | 7 (25.0) | 13 (17.6) | 11 (28.9) | 17 (34.0) |
| Strongly agree | 4 (40.0) | 10 (35.7) | 29 (39.2) | 21 (55.3) | 21 (42.0) |
|  | | | | | | |
| **I would be willing to volunteer during the pandemic if I am offered compensation** | | | | | | 0.039* |
| Strongly disagree | - | 5 (17.9) | 16 (21.6) | 9 (23.7) | 2 (4.0) |
| Somewhat disagree | 1 (10.0) | 6 (21.4) | 15 (20.3) | 4 (10.5) | 9 (18.0) |
| Neutral | 4 (40.0) | 10 (35.7) | 30 (40.5) | 13 (34.2) | 18 (36.0) |
| Somewhat agree | 4 (40.0) | 6 (21.4) | 10 (13.5) | 7 (18.4) | 11 (22.0) |
| Strongly agree | 1 (10.0) | 1 (3.6) | 3 (4.1) | 5 (13.2) | 10 (20.0) |
|  | | | | | | |
| **I would be willing to volunteer during the pandemic if I am assured my grades would not suffer and be compensated** | | | | | | 0.042* |
| Strongly disagree | - | 3 (10.7) | 16 (21.6) | 7 (18.4) | 4 (8.0) |
| Somewhat disagree | - | 4 (14.3) | 11 (14.9) | 3 (7.9) | 4 (8.0) |
| Neutral | - | 6 (21.4) | 19 (25.7) | 9 (23.7) | 12 (24.0) |
| Somewhat agree | 7 (70.0) | 10 (35.7) | 17 (23.0) | 8 (21.1) | 18 (36.0) |
| Strongly agree | 3 (30.0) | 5 (17.9) | 11 (14.9) | 11 (28.9) | 12 (24.0) |
|  | | | | | | |
| **I would be willing to volunteer during the pandemic if I am guaranteed coverage of treatment cost if I get infected** | | | | | | 0.043* |
| Strongly disagree | - | 6(21.4) | 14(18.9) | 9(23.7) | 4(8.0) |
| Somewhat disagree | - | 1(3.6) | 9(12.2) | 3(7.9) | 2(4.0) |
| Neutral | - | 6(21.4) | 11(14.9) | 5(13.2) | 7(14.0) |
| Somewhat agree | 4(40.0) | 6(21.4) | 20(27.0) | 4(10.5) | 14(28.0) |
| Strongly agree | 6(60.0) | 9(32.1) | 20(27.0) | 17(44.7) | 23(46.0) |
|  | | | | | | |
| **I would be willing to volunteer during the pandemic if I am offered a separate accommodation during the duration of my volunteer work** | | | | | | 0.012* |
| Strongly disagree | - | 4 (14.3) | 11 (14.9) | 8 (21.1) | 2 (4.0) |
| Somewhat disagree | - | 3 (10.7) | 16 (21.6) | 3 (7.9) | 1 (2.0) |
| Neutral | 2 (20.0) | 7 (25.0) | 10 (13.5) | 6 (15.8) | 8 (16.0) |
| Somewhat agree | 4 (40.0) | 5 (17.9) | 14 (18.9) | 5 (13.2) | 13 (26.0) |
| Strongly agree | 4 (40.0) | 9 (32.1) | 23 (31.1) | 16 (42.1) | 26 (52.0) |
|  | | | | | | |
| **I would be willing to volunteer during the pandemic if I am provided with psychological support during the pandemic** | | | | | | 0.024* |
| Strongly disagree | - | 2 (7.1) | 10 (13.5) | 5 (13.2) | 3 (6.0) |
| Somewhat disagree | - | 3 (10.7) | 9 (12.2) | 3 (7.9) | 5 (10.0) |
| Neutral | 1 (10.0) | 12 (42.9) | 26 (35.1) | 8 (21.1) | 8 (16.0) |
| Somewhat agree | 4 (40.0) | 8 (28.6) | 10 (13.5) | 8 (21.1) | 16 (32.0) |
| Strongly agree | 5 (50.0) | 3 (10.7) | 19 (25.7) | 14 (36.8) | 18 (36.0) |
|  | | | | | | |
| **How confident are you in the protection offered by N95 masks** | | | | | | 0.070* |
| Extremely unconfident | - | 2 (7.1) | 3 (4.1) | 5 (13.2) | - |
| Somewhat unconfident | - | 2 (7.1) | 7 (9.5) | 1 (2.6) | 2 (4.0) |
| Neutral | - | 3 (10.7) | 5 (6.8) | 1 (2.6) | 3 (6.0) |
| Somewhat confident | 8 (80.0) | 8 (28.6) | 24 (32.4) | 11 (28.9) | 22 (44.0) |
| Extremely confident | 2 (20.0) | 13 (46.4) | 35 (47.3) | 20 (52.6) | 23 (46.0) |
|  | | | | | | |
| **How confident are you in the protection offered by Gloves** | | | | | | 0.016* |
| Extremely unconfident | 2 (20.0) | 1 (3.6) | 4 (5.4) | 5 (13.2) | - |
| Somewhat unconfident | - | 3 (10.7) | 10 (13.5) | 2 (5.3) | 8 (16.0) |
| Neutral | 4 (40.0) | 9 (32.1) | 17 (23.0) | 6 (15.8) | 8 (16.0) |
| Somewhat confident | 3 (30.0) | 6 (21.4) | 25 (33.8) | 7 (18.4) | 20 (40.0) |
| Extremely confident | 1 (10.0) | 9 (32.1) | 18 (24.3) | 18 (47.4) | 14 (28.0) |
|  | | | | | | |
| **How confident are you in the protection offered by Gowns** | | | | | | 0.010* |
| Extremely unconfident | - | 1 (3.6) | 3 (4.1) | 3 (7.9) | 1 (2.0) |
| Somewhat unconfident | - | 4 (14.3) | 6 (8.1) | 4 (10.5) | 2 (4.0) |
| Neutral | - | 5 (17.9) | 15 (20.3) | 1 (2.6) | 4 (8.0) |
| Somewhat confident | 8 (80.0) | 11 (39.3) | 19 (25.7) | 9 (23.7) | 21 (42.0) |
| Extremely confident | 2 (20.0) | 7 (25.0) | 31 (41.9) | 21 (55.3) | 22 (44.0) |

**Table S3:** Significant associations identified with academic year of study of medical students

| **Characteristics** | **Doctors**  **n (%)** |
| --- | --- |
| **Maximum shift willing to work during the pandemic** | |
| Extended shift (12h everyday) | 31 (16.6) |
| Usual shift | 133 (71.1) |
| None | 23 (12.3) |
|  | |
| **Pandemic course/training taken** | |
| Yes | 34 (18.2) |
| No | 153 (81.8) |
|  | |
| **Moral obligation for doctors to work during the pandemic** | |
| Yes | 125 (66.8) |
| No | 47 (25.1) |
| I don’t know | 15 (8.0) |
|  | |
| **Should doctors have the right to refuse treatment to those infected** | |
| Yes | 79 (42.2) |
| No | 84 (44.9) |
| I don’t know | 24 (12.8) |
|  | |
| **Should government require doctors to work if there is a shortage during the pandemic** | |
| Yes | 83 (44.4) |
| No | 66 (35.3) |
| I don’t know | 38 (20.3) |
|  | |
| **Should retired doctors volunteer if there is a shortage during the pandemic** | |
| Yes | 87 (46.5) |
| No | 81 (43.3) |
| I don’t know | 19 (10.2) |
|  | |
| **Should doctors be penalized if they refuse to work if required to during the pandemic** | |
| Yes | 24 (12.8) |
| No | 150 (80.2) |
| I don’t know | 13 (7.0) |
|  | |
| **Type of penalty if doctors refuse to work if required to during the pandemic** | |
| Fined | 7 (3.7) |
| Pay cut | 16 (8.6) |
| Termination from work | 8 (4.3) |
| Not applicable | 156 (83.4) |
|  | |
| **Type of financial compensation that should be given by hospital/government for working during the pandemic** | |
| All doctors should be given Hazard pay | 176 (94.1) |
| Doctors should not be given Hazard pay | 1 (0.5) |
| Doctors should only be given Hazard pay if infected | 6 (3.2) |
| Families of doctors should only be given financial compensation if death results | 4 (2.1) |

**Table S4:** Characteristics surrounding willingness to work of doctors during the COVID-19 pandemic

|  | **Training level** | | | | | **P - value** |
| --- | --- | --- | --- | --- | --- | --- |
|  | **Consultant** | **Resident** | **Medical officer** | **House officer** | **Graduate only** |  |
| **n (%)** | **n (%)** | **n (%)** | **n (%)** | **n (%)** |
| **Working during the pandemic** | | | | | | 0.000* |
| Yes | 15 (88.2) | 55 (94.8) | 32 (56.1) | 34 (73.9) | 3 (33.3) |
| No | 2 (11.8) | 3 (5.2) | 25 (43.9) | 12 (26.1) | 6 (66.7) |
|  | | | | | | |
| **Willing to work during the pandemic** | | | | | | 0.038** |
| Yes | 16 (94.1) | 45 (77.6) | 44 (77.2) | 29 (63.0) | 6 (66.7) |
| No | 1 (5.9%) | 8 (13.8) | 4 (7.0) | 13 (28.3) | 3 (33.3) |
| I don’t know | - | 5 (8.6) | 9 (15.8) | 4 (8.7) | - |
|  | | | | | | |
| **Maximum shift willing to work** | | | | | | 0.027* |
| Extended shift | 2 (11.8) | 13 (22.4) | 8 (14.0) | 8 (17.4) | - |
| Usual shift | 15 (88.2) | 39 (67.2) | 45 (78.9) | 27 (58.7) | 7 (77.8) |
| None | - | 6 (10.3) | 4 (7.0) | 11 (23.9) | 2 (22.2) |
|  | | | | | | |
| **Have you taken any pandemic course/training** | | | | | | 0.016** |
| Yes | 8 (47.1) | 13 (22.4) | 7 (12.3) | 5 (10.9) | 1 (11.1) |
| No | 9 (52.9) | 45 (77.6) | 50 (87.7) | 41 (89.1) | 8 (88.9) |
|  | | | | | | |
| **I would be willing to work during the pandemic if I have sufficient knowledge and skill to work** | | | | | | 0.023* |
| Strongly disagree | - | 3 (5.2) | 5 (8.8) | 3 (6.5) | 1 (1.11) |
| Somewhat disagree | - | 6 (10.3) | - | 4 (8.7) | 1 (11.1) |
| Neutral | 2 (11.8) | 11 (19.0) | 13 (22.8) | 14 (30.4) | 1 (11.1) |
| Somewhat agree | 2 (11.8) | 22 (37.9) | 19 (33.3) | 12 (26.1) | 3 (33.3) |
| Strongly agree | 13 (76.5) | 16 (27.6) | 20 (35.1) | 13 (28.3) | 3 (33.3) |
|  | | | | | | |
| **I would be willing to work during the pandemic if I am provided with Personal Protective Equipment (PPE)** | | | | | | 0.038* |
| Strongly disagree | - | 2 (3.4) | 4 (7.0) | 3 (6.5) | 2 (22.2) |
| Somewhat disagree | - | 10 (17.2) | 5 (8.8) | 2 (4.3) | - |
| Neutral | 1 (5.9) | 5 (8.6) | 10 (17.5) | 8 (17.4) | 1 (11.1) |
| Somewhat agree | 2 (11.8) | 14 (24.1) | 10 (17.5) | 12 (26.1) | - |
| Strongly agree | 14 (82.4) | 27 (46.6) | 28 (49.1) | 21 (45.7) | 6 (66.7) |
|  | | | | | | |
| **I would be willing to work during the pandemic if I am offered a separate accommodation during the duration of my work** | | | | | | 0.002* |
| Strongly disagree | 8 (47.1) | 32 (55.2) | 12 (21.1) | 15 (32.6) | 3 (33.3) |
| Somewhat disagree | 4 (23.5) | 9 (15.5) | 6 (10.5) | 5 (10.9) | 1 (11.1) |
| Neutral | 3 (17.6) | 11 (19.0) | 11 (19.3) | 9 (19.6) | 1 (11.1) |
| Somewhat agree | 2 (11.8) | 3 (5.2) | 8 (14.0) | 7 (15.2) | 1 (11.1) |
| Strongly agree | - | 3 (5.2) | 20 (35.1) | 10 (21.7) | 3 (33.3) |
|  | | | | | | |
| **I would be willing to work during the pandemic if I am provided with transportation to and back from the hospital** | | | | | | 0.000* |
| Strongly disagree | 5 (29.4) | 30 (51.7) | 7 (12.3) | 9 (19.6) | 4 (44.4) |
| Somewhat disagree | 5 (29.4) | 9 (15.5) | 3 (5.3) | 2 (4.3) | - |
| Neutral | 5 (29.4) | 13 (22.4) | 12 (21.1) | 7 (15.2) | - |
| Somewhat agree | 2 (11.8) | 2 (3.4) | 16 (28.1) | 11 (23.9) | 1 (11.1) |
| Strongly agree | - | 4 (6.9) | 19 (33.3) | 17 (37.0) | 4 (44.4) |
|  | | | | | | |
| **Do you believe that doctors have a moral obligation to work during the pandemic** | | | | | | 0.003** |
| Yes | 13 (76.5) | 49 (84.5) | 34 (59.6) | 25 (54.3) | 4 (44.4) |
| No | 2 (11.8) | 5 (8.6) | 19 (33.3) | 16 (34.8) | 5 (55.6) |
| I don’t know | 2 (11.8) | 4 (6.9) | 4 (7.0) | 5 (10.9) | - |
|  | | | | | | |
| **Should retired doctors be strongly encouraged to volunteer if there is a shortage of doctors during the pandemic** | | | | | | 0.044** |
| Yes | 4 (23.5) | 26 (44.8) | 26 (45.6) | 25 (54.3) | 6 (66.7) |
| No | 13 (76.5) | 28 (48.3) | 23 (40.4) | 16 (34.8) | 1 (11.1) |
| I don’t know | - | 4 (6.9) | 8 (14.0) | 5 (10.9) | 2 (22.2) |

**Table S5:** Significant associations identified with training level of doctors

| **Characteristics** | **Medical students n (%)** |
| --- | --- |
| **Hospital roles you would be willing to volunteer for** | |
| COVID unit | 17 (8.5) |
| Non-COVID unit | 97 (48.5) |
| Both | 53 (26.5) |
| Not willing | 33 (16.5) |
|  | |
| **Pandemic course taken** | |
| Yes | 35 (17.5) |
| No | 165 (82.5) |
|  | |
| **Moral obligation for medical students to volunteer during the pandemic** | |
| Yes | 76 (38.0) |
| No | 78 (39.0) |
| I don’t know | 46 (23.0) |
|  | |
| **Should government require medical students to volunteer if few volunteer during the pandemic** | |
| Yes | 64 (32.0) |
| No | 81 (40.5) |
| I don’t know | 55 (27.5) |
|  | |
| **Should retired doctors volunteer if there is a shortage of doctors during the pandemic** | |
| Yes | 90 (45.0) |
| No | 79 (39.5) |
| I don’t know | 31 (15.5) |
|  | |
| **Should medical students be penalised if they refuse to volunteer if required to during the pandemic** | |
| Yes | 12 (6.0) |
| No | 174 (87.0) |
| I don’t know | 14 (7.0) |
|  | |
| **Type of penalty if medical students refuse to volunteer if required to during the pandemic** | |
| Fined | 14 (7.0) |
| Expulsion from university | 1 (0.5) |
| Not applicable | 185 (92.5) |
|  | |
| **Type of financial compensation that should be given by hospital/government for volunteering during the pandemic** | |
| All volunteers should be given financial compensation | 127 (63.5) |
| Volunteers should only be given financial compensation if infected | 59 (29.5) |
| Families of volunteers should only be given financial compensation if death results | 5 (2.5) |
| Volunteers should not be given financial compensation | 9 (4.5) |

**Table S6:** Characteristics surrounding willingness of medical students to volunteer during the COVID-19 pandemic
